# Supplementary material for: The 25(OH)D3, but Not 1,25(OH)2D3 Levels Are Elevated in IBD Patients Regardless of Vitamin D Supplementation and Do Not Associate with Pain Severity or Frequency
Source: PubMed Central journal article supplement (PMC8004142; doi:10.3390/ph14030284), 2021-03-22
Supplement: pharmaceuticals-14-00284-s001.pdf [file pharmaceuticals-14-00284-s001.pdf]

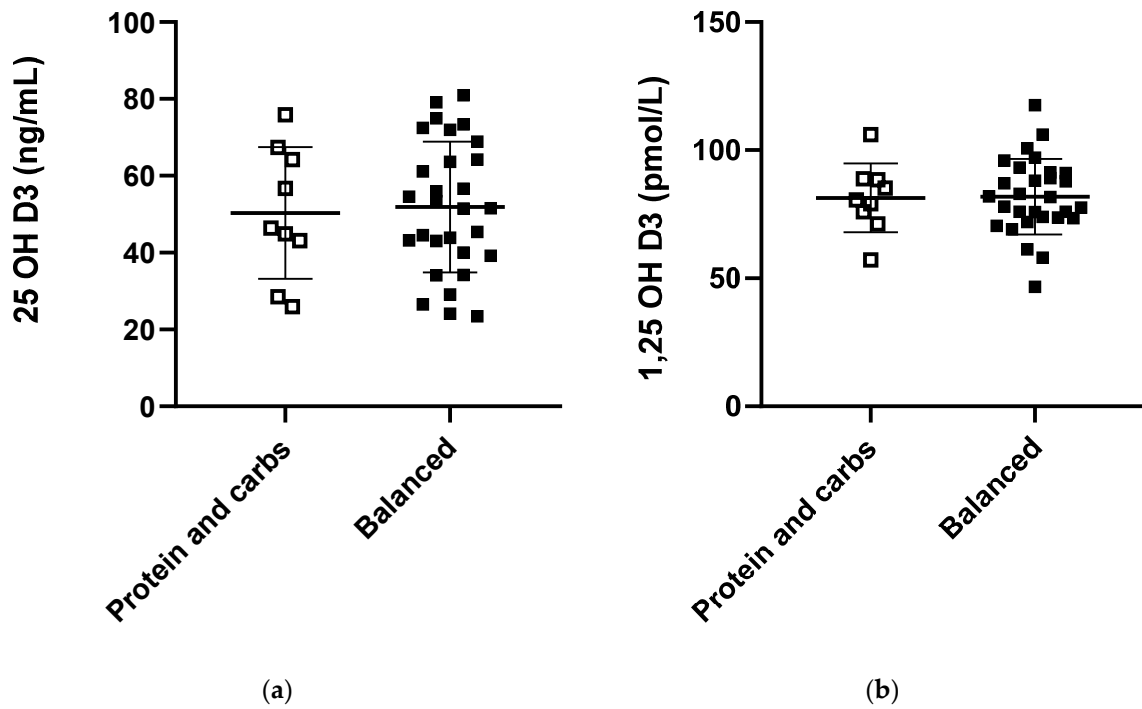

**Figure S1.** Serum concentration of 25-hydroxy Vitamin D (25(OH) Vitamin D) (a) and 1,25-hydroxy Vitamin D (1,25(OH)<sub>2</sub> Vitamin D) (b) in IBD patients applying protein and carbohydrate- rich diet or balanced diet.

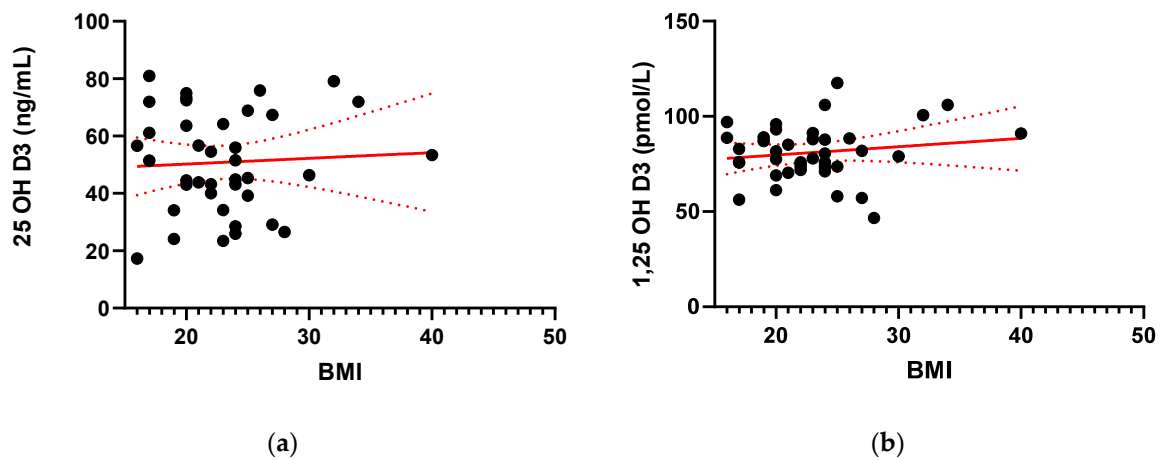

**Figure S2.** Correlation between serum concentration of 25-hydroxy Vitamin D (25(OH) Vitamin D) (a) and 1,25-hydroxy Vitamin D (1,25(OH)<sub>2</sub> Vitamin D) (b) and the values of body mass index (BMI).

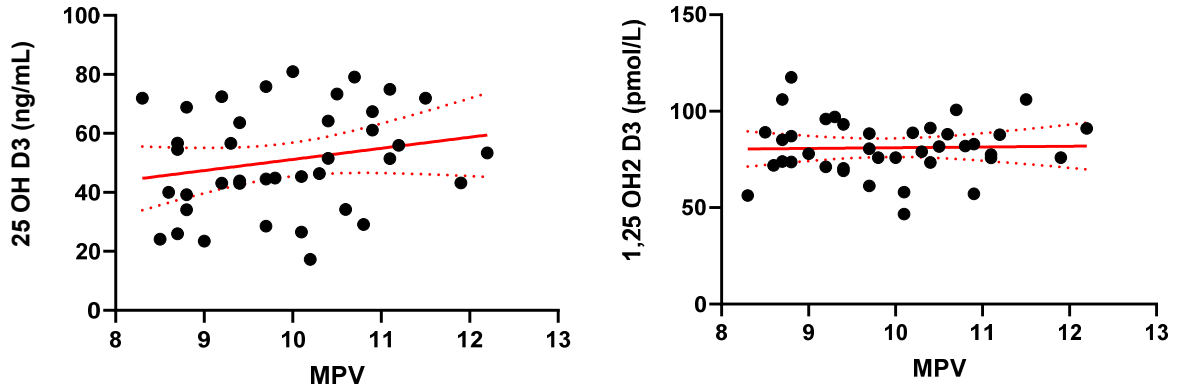

(a)

(b)

**Figure S3.** Correlation between serum concentration of 25-hydroxy Vitamin D (25(OH) Vitamin D) (a) and 1,25-hydroxy Vitamin D (1,25(OH)<sub>2</sub> Vitamin D) (b) and the values of mean platelet volume (MPV) in IBD patients.

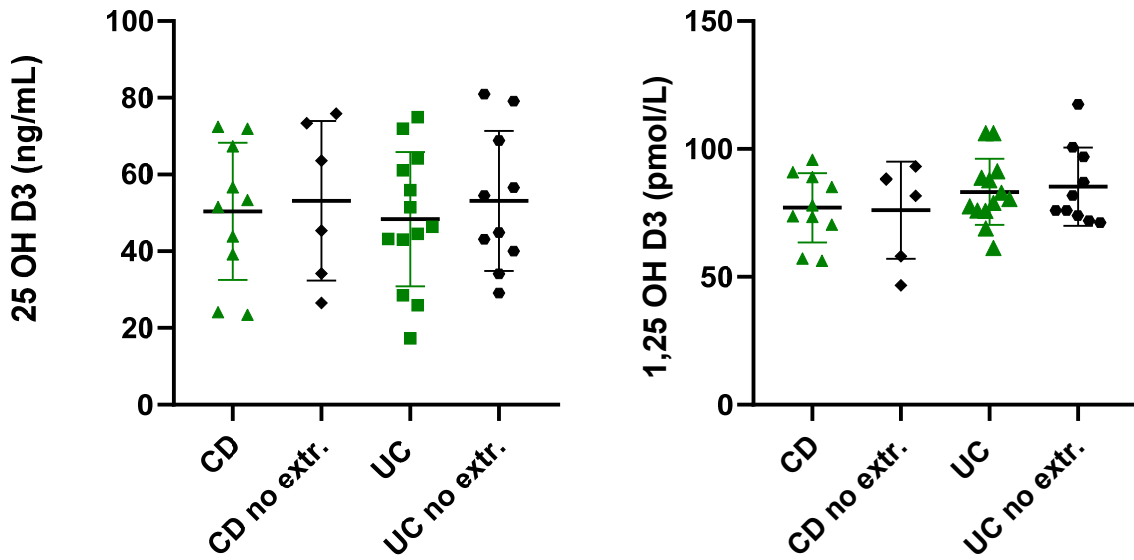

(a)

(b)

**Figure S4.** Serum concentration of 25-hydroxy Vitamin D (25(OH) Vitamin D) (a) and 1,25-hydroxy Vitamin D (1,25(OH)<sub>2</sub> Vitamin D) (b) in IBD patients with and without extraintestinal symptoms.
